# Supplementary material
Source: MDPI journal article supplement (https://www.mdpi.com/2073-4441/9/2/128)
Supplement: s1 [file s1]

## Sheet: pond nearest home
				Raw numbers
			Pond name	Blackford (EH10 6BR)	Goreglen forest (EH23 3DS)	Granton (EH5 1QN)	Inverleith (EH3 5NZ)	Juniper Green (Woodhall millbrae) (EH14 5BH)	Eliburn (EH54 7EZ)	Oxgangs- Firrhill Neuk (EH13 9FF)	Royal Botanic Gardens Edinburgh (EH3 5NZ)
			Number in sample	94	37	20	47	27	7	24	27
				Ranked
			Pond name	Blackford (EH10 6BR)	Goreglen forest (EH23 3DS)	Royal Botanic Gardens Edinburgh (EH3 5NZ)	Inverleith (EH3 5NZ)	Juniper Green (Woodhall millbrae) (EH14 5BH)	Oxgangs- Firrhill Neuk (EH13 9FF)	Granton (EH5 1QN)	Eliburn (EH54 7EZ)
			Number in sample	94	37	27	47	27	24	20	7

## Sheet: Home
					Numbers
	Rating	The accommodation (size, condition)	Location/ proximity to amenities (local services)	Environs (natural surroundings/ general impression of the environment)	Parking provision	Price/ Rental cost	School	Garden	totals
	1	138	77	99	61	108	56	84	624
	2	87	81	77	63	64	51	79	504
	3	20	67	42	52	32	47	33	296
	4	26	28	31	35	30	24	23	201
	5	12	19	20	43	24	70	38	231
	totals	283	272	269	254	258	248	257
				%
	Rating	The accommodation (size, condition)	Location/ proximity to amenities (local services)	Environs (natural surroundings/ general impression of the environment)	Parking provision	Price/ Rental cost	School	Garden
	1	48.7633	28.3088	36.803	24.0157	41.8605	22.5806	32.6848
	2	30.742	29.7794	28.6245	24.8031	24.8062	20.5645	30.7393
	3	7.06714	24.6324	15.6134	20.4724	12.4031	18.9516	12.8405
	4	9.18728	10.2941	11.5242	13.7795	11.6279	9.67742	8.94942
	5	4.24028	6.98529	7.43494	16.9291	9.30233	28.2258	14.786
		ranked %
	Rating	The accommodation (size, condition) (n=283)	Price/ Rental cost (n=258)	Environs (natural surroundings/ general impression of the environment) (n=269)	Garden (n=257)	Location/ proximity to amenities (local services) (n=272)	Parking provision (n=254)	School (n=248)
	1	48.7633	41.8605	36.803	32.6848	28.3088	24.0157	22.5806
	2	30.742	24.8062	28.6245	30.7393	29.7794	24.8031	20.5645
	3	7.06714	12.4031	15.6134	12.8405	24.6324	20.4724	18.9516
	4	9.18728	11.6279	11.5242	8.94942	10.2941	13.7795	9.67742
	5	4.24028	9.30233	7.43494	14.786	6.98529	16.9291	28.2258

## Sheet: neighbourhood
	Raw numbers
Rating	Safety of the area	Proximity to amenities (services)	Low crime rates	Open space- water, parks, and other greenery	Sense of community	Activities (hobbies, courses available)
1	161	74	114	127	72	40
2	49	81	77	66	84	55
3	28	78	77	36	56	76
4	15	26	19	26	24	39
5	23	17	24	21	34	22
Total	276	276	311	276	270	232
		%
	percentages
Rating	Safety of the area (n=276)	Proximity to amenities (services) (n=276)	Low crime rates	Open space- water, parks, and other greenery	Sense of community	Activities (hobbies, courses available)
1	58.3333	26.8116	36.6559	46.0145	26.6667	17.2414
2	17.7536	29.3478	24.7588	23.913	31.1111	23.7069
3	10.1449	28.2609	24.7588	13.0435	20.7407	32.7586
4	5.43478	9.42029	6.10932	9.42029	8.88889	16.8103
5	8.33333	6.15942	7.71704	7.6087	12.5926	9.48276
	Ranked percentages
Rating	Safety of the area (n=276)	Open space- water, parks, and other greenery (n=276)	Low crime rates (n=311)	Proximity to amenities (services) (n=276)	Sense of community (n=270)	Activities (hobbies, courses available) (n=232)
1	58.3333	46.0145	36.6559	26.8116	26.6667	17.2414
2	17.7536	23.913	24.7588	29.3478	31.1111	23.7069
3	10.1449	13.0435	24.7588	28.2609	20.7407	32.7586
4	5.43478	9.42029	6.10932	9.42029	8.88889	16.8103
5	8.33333	7.6087	7.71704	6.15942	12.5926	9.48276

## Sheet: benefits
	raw numbers																													2												3
Rating	Can be used for walking pets	Provides biodiversity (plants and animals) to the surrounding area	Sustainable drainage solution	Education purposes for children	Adds to the value of homes	Proximity to parks	Prettiness	Health	Other services or amenities
1	71	137	50	68	31	64	68	42	19
2	33	55	50	75	32	73	71	65	31
3	37	26	67	49	59	50	62	64	70
4	15	13	28	28	49	30	18	26	27
5	66	19	25	24	44	26	23	29	34
Total	222	250	220	244	215	243	242	226	181
	percentages
Rating	Can be used for walking pets	Provides biodiversity (plants and animals) to the surrounding area	Sustainable drainage solution	Education purposes for children	Adds to the value of homes	Proximity to parks	Prettiness	Health	Other services or amenities
1	31.982	54.8	22.7273	27.8689	14.4186	26.3374	28.0992	18.5841	10.4972
2	14.8649	22	22.7273	30.7377	14.8837	30.0412	29.3388	28.7611	17.1271
3	16.6667	10.4	30.4545	20.082	27.4419	20.5761	25.6198	28.3186	38.674
4	6.75676	5.2	12.7273	11.4754	22.7907	12.3457	7.43802	11.5044	14.9171
5	29.7297	7.6	11.3636	9.83607	20.4651	10.6996	9.50413	12.8319	18.7845
	Highest to lowest
Rating	Provides biodiversity (plants and animals) to the surrounding area (n=250)	Can be used for walking pets (n=222)	Prettiness (n=242)	Education purposes for children (n=244)	Proximity to parks (green space) (n=243)	Sustainable drainage solution (n=220)	Health (n=226)	Adds value to homes (n=215)	Other services or amenities (n=181)
1	54.8	31.982	28.0992	27.8689	26.3374	22.7273	18.5841	14.4186	10.4972
2	22	14.8649	29.3388	30.7377	30.0412	22.7273	28.7611	14.8837	17.1271
3	10.4	16.6667	25.6198	20.082	20.5761	30.4545	28.3186	27.4419	38.674
4	5.2	6.75676	7.43802	11.4754	12.3457	12.7273	11.5044	22.7907	14.9171
5	7.6	29.7297	9.50413	9.83607	10.6996	11.3636	12.8319	20.4651	18.7845

## Sheet: dangers
					raw numbers
				Column1	Electrical substation	Incinerator	Busy road	Pond	River	Quarry	High levels of crime	Derelict building	Industrial area
				1	51	53	146	16	20	56	121	51	31
				2	48	53	58	35	47	66	63	72	68
				3	62	53	29	61	76	64	34	66	73
				4	39	36	6	50	47	37	11	31	33
				5	33	33	13	63	38	17	16	18	26
				Total	233	228	252	225	228	240	245	238	231
					percentages
				Column1	Electrical substation	Incinerator	Busy road	Pond	River	Quarry	High levels of crime	Derelict building	Industrial area
				1	21.8884	23.2456	57.9365	7.11111	8.77193	23.3333	49.3878	21.4286	13.4199
				2	20.6009	23.2456	23.0159	15.5556	20.614	27.5	25.7143	30.2521	29.4372
				3	26.6094	23.2456	11.5079	27.1111	33.3333	26.6667	13.8776	27.7311	31.6017
				4	16.7382	15.7895	2.38095	22.2222	20.614	15.4167	4.4898	13.0252	14.2857
				5	14.1631	14.4737	5.15873	28	16.6667	7.08333	6.53061	7.56303	11.2554
					ranked numbers
				Rating	Busy road (n=252)	High levels of crime (n=245)	Incinerator (n=228)	Quarry (n=240)	Electrical substation (n=233)	Derelict building (n=238)	Industrial area (n=231)	River (n=228)	Pond (n=225)
				1	57.9365	49.3878	23.2456	23.3333	21.8884	21.4286	13.4199	8.77193	7.11111
				2	23.0159	25.7143	23.2456	27.5	20.6009	30.2521	29.4372	20.614	15.5556
				3	11.5079	13.8776	23.2456	26.6667	26.6094	27.7311	31.6017	33.3333	27.1111
				4	2.38095	4.4898	15.7895	15.4167	16.7382	13.0252	14.2857	20.614	22.2222
				5	5.15873	6.53061	14.4737	7.08333	14.1631	7.56303	11.2554	16.6667	28

## Sheet: disadvantages
	Raw numbers
Rating	Promotes vandalism	Presents safety risks	Source of flooding	Accumulates litter	Attracts insects	Attracts rodents	Aesthetically unpleasant	Unpleasant smells
1	19	33	18	37	40	37	17	18
2	23	33	28	48	35	56	11	27
3	40	67	57	58	36	47	31	31
4	50	55	45	54	39	43	31	53
5	103	54	85	43	77	55	128	99
	235	242	233	240	227	238	218	228
	Percentages
Rating	Promotes vandalism	Presents safety risks	Source of flooding	Accumulates litter	Attracts insects	Attracts rodents	Aesthetically unpleasant	Unpleasant smells
1	8.08511	13.6364	7.72532	15.4167	17.6211	15.5462	7.79817	7.89474
2	9.78723	13.6364	12.0172	20	15.4185	23.5294	5.04587	11.8421
3	17.0213	27.686	24.4635	24.1667	15.859	19.7479	14.2202	13.5965
4	21.2766	22.7273	19.3133	22.5	17.1806	18.0672	14.2202	23.2456
5	43.8298	22.314	36.4807	17.9167	33.9207	23.1092	58.7156	43.4211
	Ranked
Rating	Attracts insects (n=227)	Attracts rodents (n=238)	Accumulates litter (n=240)	Presents safety risks (n=242)	Promotes vandalism(n=235)	Unpleasant smells (n=228)	Aesthetically unpleasant (n=218)	Source of flooding (n=233)
1	17.6211	15.5462	15.4167	13.6364	8.08511	7.89474	7.79817	7.72532
2	15.4185	23.5294	20	13.6364	9.78723	11.8421	5.04587	12.0172
3	15.859	19.7479	24.1667	27.686	17.0213	13.5965	14.2202	24.4635
4	17.1806	18.0672	22.5	22.7273	21.2766	23.2456	14.2202	19.3133
5	33.9207	23.1092	17.9167	22.314	43.8298	43.4211	58.7156	36.4807

## Sheet: sing_part_family
															Single family
n=52	Factor	1	2	3	4	5	Column1								n=15	Factor	1	2	3	4	5
	Safety of the area	30	11	4	3	4										Safety of the area	9	3	1	1	1
	Proximity to amenities (services)	17	12	15	6	2										Proximity to amenities (services)	6	3	5	1	0
	Low crime rates	19	16	6	5	2										Low crime rates	7	4	2	1	0
	Open space- water, parks, and other greenery	22	13	6	7	3										Open space- water, parks, and other greenery	10	1	2	0	1
	Sense of community	12	14	10	5	10										Sense of community	8	5	1	0	1
	Activities (hobbies, courses available)	6	11	14	6	9										Activities (hobbies, courses available)	5	4	4	2	0
	n	106	77	55	32	30										n	45	20	15	5	3
	Total single and partner family
	Factor	1	2	3	4	5	Total
	Safety of the area	39	14	5	4	5	67
	Open space- water, parks, and other greenery	32	14	8	7	4	65
	Low crime rates	26	20	8	6	2	62
	Proximity to amenities (services)	23	15	20	7	2	67
	Sense of community	20	19	11	5	11	66
	Activities (hobbies, courses available)	11	15	18	8	9	61
	% Total single and partner family	1	2	3	4	5
	Safety of the area (n=67)	58.209	20.8955	7.46269	5.97015	7.46269
	Open space- water, parks, and other greenery (n=65)	49.2308	21.5385	12.3077	10.7692	6.15385
	Low crime rates (n=62)	41.9355	32.2581	12.9032	9.67742	3.22581
	Proximity to amenities (services) (n=67)	34.3284	22.3881	29.8507	10.4478	2.98507
	Sense of community (n=66)	30.303	28.7879	16.6667	7.57576	16.6667
	Activities (hobbies, courses available) (n=61)	18.0328	24.5902	29.5082	13.1148	14.7541

## Sheet: species_identified
		Animal type	Blackford (EH10 6BR)	Goreglen forest (EH23 3DS)	Granton (EH5 1QN)	Inverleith (EH3 5NZ)	Juniper Green (Woodhall millbrae) (EH14 5BH)	Livingston- Appleton Parkway (EH54 7EZ)	Livingston- Old Cousland Road (EH54 7ET)	Oxgangs- Firrhill Neuk (EH13 9FF)	Royal Botanic Gardens Edinburgh (EH3 5NZ)	Totals	Plant type	Blackford (EH10 6BR)	Goreglen forest (EH23 3DS)	Granton (EH5 1QN)	Inverleith (EH3 5NZ)	Juniper Green (Woodhall millbrae) (EH14 5BH)	Livingston- Appleton Parkway (EH54 7EZ)	Livingston- Old Cousland Road (EH54 7ET)	Oxgangs- Firrhill Neuk (EH13 9FF)	Royal Botanic Gardens Edinburgh (EH3 5NZ)	Totals
		Frogs	29	32	10	6	5	3	2	3	9	99	Bullrushes	19	8	7	6	4	2	1	5	9	61
		Grass hopper warbler	7	10	1	5	1	0	0	1	6	31	Pond water crowfoot	9	4	2	3	0	0	0	0	3	21
		Ducks	43	24	16	15	7	2	3	7	14	131	Rosebay willow herb	15	7	4	3	3	0	0	4	4	40
		Swans	41	19	7	11	6	3	3	5	12	107	Yellow Lily	14	1	5	3	3	0	0	2	3	31
		Otters	1	4	0	2	0	0	0	0	3	10	Purple loosestrife	10	2	5	3	2	1	1	0	3	27
		Newts	7	10	2	2	2	0	0	0	6	29	Bog bean	2	0	0	2	0	0	0	0	3	7
		Water bugs	29	22	5	7	3	1	1	5	11	84	Sedge	8	4	3	3	1	2	1	1	4	27
		Small fish	15	8	4	4	3	0	0	2	6	42
		Animal Type	Granton (EH5 1QN)	Juniper Green (Woodhall millbrae) (EH14 5BH)	Livingston- Appleton Parkway (EH54 7EZ)	Livingston- Old Cousland Road (EH54 7ET)	Oxgangs- Firrhill Neuk (EH13 9FF)	Blackford (EH10 6BR)	Goreglen forest (EH23 3DS)	Royal Botanic Gardens Edinburgh (EH3 5NZ)	Inverleith (EH3 5NZ)	Totals	Plant type	Granton (EH5 1QN)	Juniper Green (Woodhall millbrae) (EH14 5BH)	Livingston- Appleton Parkway (EH54 7EZ)	Livingston- Old Cousland Road (EH54 7ET)	Oxgangs- Firrhill Neuk (EH13 9FF)	Goreglen forest (EH23 3DS)	Royal Botanic Gardens Edinburgh (EH3 5NZ)	Inverleith (EH3 5NZ)	Totals
		Frogs	10	5	3	2	3	29	32	9	6	99	Bullrushes	7	4	2	1	5	8	9	6	42
		Grass hopper warbler	1	1	0	0	1	7	10	6	5	31	Pond water crowfoot	2	0	0	0	0	4	3	3	12
		Ducks	16	7	2	3	7	43	24	14	15	131	Rosebay willow herb	4	3	0	0	4	7	4	3	25
		Swans	7	6	3	3	5	41	19	12	11	107	Yellow Lily	5	3	0	0	2	1	3	3	17
		Otters	0	0	0	0	0	1	4	3	2	10	Purple loosestrife	5	2	1	1	0	2	3	3	17
		Newts	2	2	0	0	0	7	10	6	2	29	Bog bean	0	0	0	0	0	0	3	2	5
		Water bugs	5	3	1	1	5	29	22	11	7	84	Sedge	3	1	2	1	1	4	4	3	19
		Small fish	4	3	0	0	2	15	8	6	4	42

## Sheet: NPV WLC
		Pond name	Supports plants £(pp)	Supports mammals (£pp)	Supports fish (£pp)	Creates habitat for birds (£ pp)	Supports Invertebrates (£pp)	Total (£pp)		Pond name	Number of households	Total Population	Monthly value (£)	Annual value (£)			Pond name	NPV benefits	NPV OPEX costs	CAPEX costs	Balance
		Granton	0.526316	0.526316	0.526316	0.578947	0.421053	2.57895		Granton	1016	2315	5970.26	71643.2			Granton	1720765	1619712	990000	-888946
		Juniper Green	1.09091	1.09091	1.31818	1.09091	1.09091	5.68182		Juniper Green	606	1459	8289.77	99477.3			Juniper Green	2388284	52988	13200	2322086
		Oxgangs	2.86957	2.78261	2.95652	2.95652	2.91304	14.4783		Oxgangs	1840	3796	54959.5	659514			Oxgangs	15836096	1101592	668167	14066337
		Eliburn	5.5	3	3	5.5	7.5	24.5		Eliburn	108	364	8918	107016			Eliburn	2569335	233140	115156	2221039
		Blackford	2.39744	2.47436	2.52564	3.02564	2.08974	12.5128		Blackford	847	1988	24875.5	298506			Blackford	7165189	1966033	1336500	3862656
		Goreglen	1.72727	1.86364	1.90909	2	1.72727	9.22727		Goreglen	14	39	359.864	4318.36			Goreglen	103718	92315	41250	-29847
		RBGE	3.71429	2.7619	2.71429	3.47619	2.33333	15		RBGE	1161	2312	34680	416160			RBGE	9991540	631553	376200	8983787
		Inverleith	2.4	2.33333	2.42222	2.64444	2.46667	12.2667		Inverleith	399	804	9862.4	118349			Inverleith	2842172	5810221	3593205	-6561254
										Totals	5991	13077	147915	1.77498e+06			Total	42617099	11507554	7133678	23975858
																	Per Population	3258.94	879.984	545.513	1833.44
	Pond name	Cost for inspection (50 years)	Litter and debris removal	Grass cutting	Barrier vegetation/ pruning	Barrier vegetation weeding	Aquatic vegetation management	Desilting	Mobilisation- sediment removal	Disposal of sediment	Vegetation replacement	Total O&M
	Juniper Green	7127.92	216.689	0	1881.77	1368.56	1938.79	6614.4	18704	2102.4	12912	52866.5
	Granton	7819	11885.4	23145.3	103215	75065.7	106343	496080	18704	157680	645600	1.64554e+06
	Eliburn	7819.35	1659	3230.69	14407.1	10477.9	14843.7	57703.8	18704	18341.2	90115	237302
	Oxgangs	7819.35	8021.66	15621.1	69661.8	50663.1	71772.7	334813	18704	106421	435726	1.11922e+06
	Blackford	7819.35	13371.1	26038.4	116117	84448.9	119636	669708	18704	212868	726300	1.99501e+06
	Inverleith	7819.35	43138.1	84005.7	374620	272451	385972	1.80052e+06	18704	572300	2.34321e+06	5.90274e+06
	RBGE	7819.35	4516.45	8795.2	39221.8	28525	40410.4	188510	18704	59918.4	245328	641749
	Goreglen	7819.35	495.225	964.386	4300.64	3127.74	4430.96	20670	18704	6570	26900	93982.3
	Total	61863	83303.6	161801	723426	526128	745348	3.57462e+06	149632	1.1362e+06	4.52609e+06	1.16884e+07
